# Supplementary material
Source: publisher site journal article supplement (https://www.degruyterbrill.com/publication/isbn/9783110808650/downloadAsset/9783110808650_Inhaltsverzeichnis.pdf)
Supplement: Supplementary file 1 [file 9783110808650_Inhaltsverzeichnis.pdf]

## *Inhaltsverzeichnis*

|                                                                                                        |         |
|--------------------------------------------------------------------------------------------------------|---------|
| <i>Verzeichnis der Briefe</i> .....                                                                    | VII     |
| <i>Einleitung der Bandherausgeber</i> .....                                                            | XVII    |
| <i>I. Historische Einführung</i> .....                                                                 | XVII    |
| <i>Übersicht zu Leben und Werk Schleiermachers</i><br><i>von September 1803 bis Oktober 1804</i> ..... | XVII    |
| <i>Zu den einzelnen Briefwechseln</i> .....                                                            | XXV     |
| 1. <i>Georg Wilhelm Bartholdy</i> .....                                                                | XXV     |
| 2. <i>Johann Brahl</i> .....                                                                           | XXVI    |
| 3. <i>Carl Gustav von Brinckmann</i> .....                                                             | XXVI    |
| 4. <i>Karl Wilhelm Brunn</i> .....                                                                     | XXVII   |
| 5. <i>Carl Wilhelm von Bünting</i> .....                                                               | XXVII   |
| 6. <i>Johann Friedrich Ferdinand Delbrück</i> .....                                                    | XXVIII  |
| 7. <i>Alexander Graf zu Dohna</i> .....                                                                | XXIX    |
| 8. <i>Ludwig Graf zu Dohna</i> .....                                                                   | XXX     |
| 9. <i>Friedrich Carl Gottlieb Duisburg</i> .....                                                       | XXX     |
| 10. <i>Lucie Eichmann</i> .....                                                                        | XXX     |
| 11. <i>Heinrich Karl Abraham Eichstädt</i> .....                                                       | XXXI    |
| 12. <i>Friedrich Frommann</i> .....                                                                    | XXXI    |
| 13. <i>Johann Wolfgang von Goethe</i> .....                                                            | XXXII   |
| 14. <i>Eleonore Grunow</i> .....                                                                       | XXXII   |
| 15. <i>Ludwig Friedrich und Johanna Heindorf</i> .....                                                 | XXXIII  |
| 16. <i>Christlieb Benjamin Hering</i> .....                                                            | XXXIV   |
| 17. <i>Henriette Herz</i> .....                                                                        | XXXIV   |
| 18. <i>Charlotte von Kathen</i> .....                                                                  | XXXIV   |
| 19. <i>Brenna de Lemos</i> .....                                                                       | XXXV    |
| 20. <i>Friedrich Severin Metger</i> .....                                                              | XXXV    |
| 20. <i>Henriette von Mühlentfels</i> .....                                                             | XXXVI   |
| 22. <i>August Hermann Niemeyer</i> .....                                                               | XXXVI   |
| 23. <i>Heinrich Eberhard Gottlob Paulus</i> .....                                                      | XXXVII  |
| 24. <i>Charlotte Pistorius</i> .....                                                                   | XXXVIII |
| 25. <i>Georg Andreas Reimer</i> .....                                                                  | XXXIX   |
| 26. <i>Friedrich Samuel Gottfried Sack</i> .....                                                       | XL      |

|                                                                         |        |
|-------------------------------------------------------------------------|--------|
| 27. August Wilhelm Schlegel .....                                       | XL     |
| 28. Friedrich Schlegel .....                                            | XLI    |
| 29. Christiane Caroline Schlegel-Schleiermacher .....                   | XLII   |
| 30. Charlotte Schlegel-Schleiermacher .....                             | XLII   |
| 31. Carl Schlegel-Schleiermacher .....                                  | XLIII  |
| 32. Theodor Anton Heinrich Schmalz .....                                | XLIII  |
| 33. Georg Ludwig Spalding .....                                         | XLIV   |
| 34. Johann Friedrich Stötzer .....                                      | XLV    |
| 35. Samuel Ernst Timotheus Stubenrauch .....                            | XLV    |
| 36. Taubenheim .....                                                    | XLVI   |
| 37. Ludwig Friedrich Franz Theremin .....                               | XLVI   |
| 38. Johann Christoph Wedeke .....                                       | XLVII  |
| 39. Luise von Willich .....                                             | XLVII  |
| 40. Johann Ehrenfried Theodor von Willich .....                         | XLVII  |
| 41. Amtlicher Schriftwechsel .....                                      | XLVIII |
| Schlegel-Schleiermacher als Prüfer im ersten theologischen Examen ..... | XLIX   |
| II. Editorischer Bericht .....                                          | LIV    |
| Verzeichnis der einzelnen Briefwechsel .....                            | LV     |

### *Briefwechsel September 1803 bis Oktober 1804*

|                                           |     |
|-------------------------------------------|-----|
| Briefe 1541–1830 .....                    | 3   |
| Verzeichnis der Abbildungen .....         | 473 |
| Abkürzungen und editorische Zeichen ..... | 475 |
| Literaturverzeichnis .....                | 477 |
| Register der Namen und Werke .....        | 493 |
| Ergänzungen zu KGA V/2 und V/3 .....      | 541 |

## Verzeichnis der Briefe

*Das \* vor der Briefnummer bezeichnet erschlossene Briefe.*

|                                                                                              |    |
|----------------------------------------------------------------------------------------------|----|
| *1541. Von Henriette Herz. Vor dem 2.9.1803 .....                                            | 3  |
| 1542. An Georg Andreas Reimer.<br>Stolp, Anfang September 1803 .....                         | 3  |
| 1543. An H. Herz. Stolp, wohl Freitag, 2.9.1803 .....                                        | 4  |
| 1544. Von Ludwig Friedrich Heindorf.<br>Scharfenbrück, Sonnabend, 3.9.1803 .....             | 6  |
| 1545. An G.A. Reimer. Stolp, wohl Anfang September 1803 ...                                  | 10 |
| *1546. Von Alexander Graf zu Dohna.<br>Anfang August oder September 1803 .....               | 11 |
| *1547. Von Alexander Graf zu Dohna.<br>Anfang August oder September 1803 .....               | 12 |
| *1548. An Lucie Eichmann. Stolp, vor dem 7.9.1803 .....                                      | 12 |
| 1549. Von L. Eichmann.<br>Charlottenburg, Mittwoch, 7.9. bis Donnerstag, 8.9.1803            | 12 |
| 1550. Von Friedrich Frommann. Jena, Donnerstag, 8.9.1803 ...                                 | 16 |
| *1551. An Samuel Ernst Timotheus Stubenrauch.<br>Stolp, vor dem 9.9.1803 .....               | 17 |
| 1552. Von S.E.T. Stubenrauch.<br>Landsberg, Sonnabend, 10.9. bis Montag, 12.9.1803 .....     | 19 |
| *1553. An Ludwig Graf zu Dohna.<br>Vor Mitte August oder September 1803 .....                | 21 |
| *1554. An Johann Friedrich Stötzer (?).<br>Vor Mitte August oder September 1803 .....        | 21 |
| *1555. An Georg Ludwig Spalding. Stolp, vor dem 18.9.1803 ...                                | 21 |
| *1556. An G.L. Spalding. Stolp, vor dem 18.9.1803 .....                                      | 21 |
| 1557. Von G.L. Spalding, Charlottenburg, Sonntag, 18.9.1803 ..                               | 21 |
| 1558. Von Charlotte Schleiermacher.<br>Gnadenfrei, vor dem 19.9. bis Montag, 3.10.1803 ..... | 25 |
| *1559. An Ch. Schleiermacher. Stolp, vor dem 19.9.1803 .....                                 | 29 |
| 1560. An G.A. Reimer. Stolp, Montag, 19.9.1803 .....                                         | 29 |
| *1561. Von Johann Ehrenfried Theodor von Willich.<br>Vor dem 20.9.1803 .....                 | 30 |

|                                                                                      |     |
|--------------------------------------------------------------------------------------|-----|
| *1562. An August Wilhelm Schlegel. Vor dem 20.9.1803 .....                           | 30  |
| *1563. Von Heinrich Karl Abraham Eichstädt.<br>Jena, Freitag, 23.9.1803 .....        | 30  |
| 1564. Von A.W. Schlegel. Berlin, Montag, 26.9.1803 .....                             | 31  |
| *1565. Von H. Herz. Vor dem 27.9.1803 .....                                          | 36  |
| 1566. An H. Herz. Stolp, Dienstag, 27.9.1803 .....                                   | 37  |
| 1567. An Alexander Graf zu Dohna.<br>Stolp, wohl August oder September 1803 .....    | 40  |
| *1568. An H.K.A. Eichstädt. Stolp, vor dem 10.10.1803 .....                          | 41  |
| 1569. Von Johann Christoph Wedeke. Vor dem 10.10.1803 .....                          | 42  |
| *1570. Von Alexander Graf zu Dohna. Vor dem 10.10.1803 .....                         | 42  |
| 1571. An Alexander Graf zu Dohna. Stolp, Montag, 10.10.1803 .....                    | 42  |
| 1572. Von G.A. Reimer. Berlin, Montag, 10.10.1803 .....                              | 45  |
| 1573. An A.W. Schlegel. Stolp, Mittwoch, 12.10.1803 .....                            | 50  |
| 1574. An Carl Gustav von Brinckmann.<br>Stolp, Mittwoch, 19.10.1803 .....            | 53  |
| 1575. An J.E.Th. von Willich. Stolp, Mittwoch, 19.10.1803 ...                        | 56  |
| *1576. An G.L. Spalding. Stolp, vor dem 21.10.1803 .....                             | 58  |
| 1577. Von G.L. Spalding. Berlin, Freitag, 21.10.1803 .....                           | 59  |
| 1578. Von Ch. Schleiermacher. Gnadenfrei, Montag, 24.10.1803 .....                   | 66  |
| 1579. An G.A. Reimer. Stolp, Mittwoch, 26.10.1803 .....                              | 70  |
| 1580. Von Johann Wolfgang von Goethe.<br>Wohl September oder Oktober 1803 .....      | 71  |
| *1581. An S.E.T. Stubenrauch.<br>Stolp, wohl Ende Oktober/Anfang November 1803 ..... | 72  |
| *1582. An L. Eichmann. Stolp, vor dem 4.11.1803 .....                                | 72  |
| *1583. An Friedrich Severin Metger. Vor dem 4.11.1803 .....                          | 73  |
| 1584. Von F.S. Metger. Berlin, Freitag, 4.11.1803 .....                              | 73  |
| 1585. Von L. Eichmann.<br>Berlin, Freitag, 4.11. bis Donnerstag, 24.11.1803 .....    | 79  |
| 1586. Von C.G. von Brinckmann. Berlin, Sonnabend, 5.11.1803 .....                    | 81  |
| 1587. Von H.K.A. Eichstädt. Jena, Montag, 7.11.1803 .....                            | 87  |
| *1588. Von F. Frommann. Jena, vor dem 9.11.1803 .....                                | 90  |
| 1589. Von G.A. Reimer. Berlin, Mittwoch, 9.11.1803 .....                             | 90  |
| 1590. An G.A. Reimer. Stolp, Freitag, 11.11.1803 .....                               | 93  |
| *1591. An F. Frommann. Stolp, Dienstag, 15.11.1803 .....                             | 95  |
| *1592. An Johann Friedrich Ferdinand Delbrück.<br>Stolp, vor dem 19.11.1803 .....    | 95  |
| 1593. Von J.F.F. Delbrück. Berlin, Sonnabend, 19.11.1803 .....                       | 95  |
| *1594. An Ch. Schleiermacher. Stolp, wohl vor dem 20.11.1803 ..                      | 103 |

|                                                                                             |     |
|---------------------------------------------------------------------------------------------|-----|
| *1595. An G.L. Spalding. Stolp, vor dem 21.11.1803 .....                                    | 103 |
| *1596. Von Brenna de Lemos (?). Vor dem 21.11.1803 .....                                    | 103 |
| *1597. Von H. Herz. Vor dem 21.11.1803 .....                                                | 104 |
| 1598. Von Ch. Schleiermacher.<br>Gnadenfrei, wohl Montag, 21.11. bis Montag, 28.11.1803     | 104 |
| 1599. Von G.L. Spalding. Berlin, Montag, 21.11.1803 .....                                   | 108 |
| 1600. An H. Herz. Stolp, Montag, 21.11.1803 .....                                           | 114 |
| *1601. Von J.E.Th. von Willich. Vor dem 26.11.1803 .....                                    | 115 |
| *1602. Von Charlotte von Kathen. Vor dem 26.11.1803 .....                                   | 115 |
| 1603. An J.E.Th. von Willich. Stolp, Sonnabend, 26.11.1803 ...                              | 115 |
| 1604. An Ch. von Kathen. Stolp, Sonnabend, 26.11.1803 .....                                 | 118 |
| 1605. An C.G. von Brinckmann. Stolp, Sonnabend, 26.11.1803 .                                | 120 |
| 1606. Von C.G. von Brinckmann. Berlin, Dienstag, 29.11.1803 .                               | 124 |
| 1607. Von F. Frommann. Jena, Donnerstag, 1.12.1803 .....                                    | 140 |
| 1608. Von G.A. Reimer. Berlin, Sonnabend, 3.12.1803 .....                                   | 142 |
| 1609. Von G.A. Reimer. Berlin, Montag, 5.12.1803 .....                                      | 144 |
| *1610. Von Johanna Heindorf. Vor dem 7.12.1803 .....                                        | 149 |
| 1611. An H. Herz. Stolp, Mittwoch, 7.12.1803 .....                                          | 150 |
| 1612. An C.G. von Brinckmann. Stolp, Mittwoch, 14.12.1803 ..                                | 150 |
| 1613. Von Ch. Schleiermacher.<br>Gnadenfrei, Donnerstag, 15.12. bis Freitag, 23.12.1803 ... | 159 |
| *1614. Von H. Herz. Vor dem 17.12.1803 .....                                                | 162 |
| *1615. Von J.C. Wedeke. Vor dem 17.12.1803 .....                                            | 162 |
| *1616. An F. Frommann. Stolp, wohl Sonnabend, 17.12.1803 ...                                | 163 |
| 1617. An G.A. Reimer. Stolp, Sonnabend, 17.12.1803 .....                                    | 163 |
| 1618. An H. Herz. Stolp, Sonnabend, 17.12.1803 .....                                        | 164 |
| 1619. Von G.L. Spalding. Berlin, Sonntag, 18.12.1803 .....                                  | 166 |
| 1620. Von S.E.T. Stubenrauch. Landsberg, Montag, 19.12.1803                                 | 166 |
| 1621. An G.A. Reimer. Stolp, Mitte Dezember 1803 .....                                      | 170 |
| 1622. Von Ch. Schleiermacher.<br>Gnadenfrei, Freitag, 23.12.1803 bis Sonntag, 8.1.1804 ...  | 172 |
| 1623. Von G.A. Reimer. Berlin, Sonnabend, 24.12.1803 .....                                  | 180 |
| *1624. An G.L. Spalding. Stolp, Montag, 26.12.1803 .....                                    | 183 |
| *1625. An J. Heindorf. Stolp, vor dem 30.12.1803 .....                                      | 183 |
| 1626. Von L.F. Heindorf. Berlin, Freitag, 30.12.1803 .....                                  | 183 |
| *1627. An Ch. Schleiermacher. Stolp, vor dem 4.1.1804 .....                                 | 185 |
| 1628. Von G.L. Spalding. Berlin, Donnerstag, 5.1.1804 .....                                 | 185 |
| 1629. An G.A. Reimer. Stolp, Sonnabend, 7.1.1804 .....                                      | 186 |
| *1630. Von Heinrich Eberhard Gottlob Paulus. Vor dem 9.1.1804                               | 187 |
| *1631. Von Eleonore Grunow. Stolp, vor dem 9.1.1804 .....                                   | 187 |

|                                                                                        |     |
|----------------------------------------------------------------------------------------|-----|
| 1632. An Alexander Graf zu Dohna. Stolp, Montag, 9.1.1804 ..                           | 187 |
| *1633. Von Alexander Graf zu Dohna. Wohl Dienstag, 10.1.1804                           | 189 |
| 1634. An H.E.G. Paulus. Stolp, Mittwoch, 11.1.1804 .....                               | 189 |
| 1635. Von G.A. Reimer. Berlin, Mittwoch, 11.1.1804 .....                               | 192 |
| 1636. Von Ludwig Friedrich Franz Theremin.<br>Berlin, Mittwoch, 11.1.1804 .....        | 194 |
| 1637. Von C.G. von Brinckmann. Berlin, Freitag, 13.1.1804 ....                         | 197 |
| *1638. An H. Herz. Stolp, wohl vor dem 16.1.1804 .....                                 | 201 |
| *1639. An G.L. Spalding. Stolp, vor dem 16.1.1804 .....                                | 201 |
| 1640. Von G.L. Spalding. Berlin, Montag, 16.1.1804 .....                               | 201 |
| *1641. An Friedrich Samuel Gottfried Sack. Vor dem 17.1.1804 .                         | 204 |
| 1642. Von F.S.G. Sack. Berlin, Dienstag, 17.1.1804 .....                               | 204 |
| *1643. An F.S. Metger. Stolp, vor dem 24.1.1804 .....                                  | 206 |
| 1644. Von F.S. Metger. Berlin, Dienstag, 24.1.1804 .....                               | 206 |
| *1645. Von Johann Brahl. Königsberg, vor dem 28.1.1804 .....                           | 209 |
| 1646. An J.E.Th. von Willich. Stolp, Sonnabend, 28.1.1804 ....                         | 209 |
| *1647. An G.L. Spalding. Stolp, Mittwoch, 1.2.1804 .....                               | 211 |
| 1648. An G.A. Reimer. Stolp, Mittwoch, 1.2.1804 .....                                  | 211 |
| 1649. Von A.W. Schlegel. Berlin, Montag, 6.2.1804 .....                                | 213 |
| 1650. Von F.S. Metger. Berlin, Montag, 6.2.1804 .....                                  | 215 |
| *1651. An Ch. Schleiermacher.<br>Stolp, wohl Ende Januar/Anfang Februar 1804 .....     | 216 |
| *1652. An L. Eichmann. Stolp, wohl Anfang Februar 1804 .....                           | 216 |
| *1653. An S.E.T. Stubenrauch. Stolp, Anfang Februar 1804 .....                         | 216 |
| 1654. Von G.L. Spalding. Berlin, Freitag, 10.2.1804 .....                              | 217 |
| *1655. Von H.E.G. Paulus. Würzburg, Sonnabend, 11.2.1804 ...                           | 219 |
| 1656. Von L.F. Heindorf. Berlin, Sonnabend, 11.2.1804 .....                            | 219 |
| 1657. Von Ch. Schleiermacher.<br>Gnadenfrei, vor dem 13.2. bis Montag, 13.2.1804 ..... | 223 |
| 1658. Von G.A. Reimer. Berlin, Montag, 13.2.1804 .....                                 | 225 |
| 1659. An Alexander Graf zu Dohna.<br>Stolp, wohl Anfang/Mitte Februar 1804 .....       | 228 |
| 1660. An G.A. Reimer. Stolp, Mittwoch, 15.2.1804 .....                                 | 230 |
| *1661. An G.L. Spalding. Stolp, Sonnabend, 18.2.1804 .....                             | 232 |
| 1662. Von S.E.T. Stubenrauch. Landsberg, Sonntag, 19.2.1804 .                          | 232 |
| 1663. An G.A. Reimer. Stolp, Donnerstag, 23.2.1804 .....                               | 234 |
| 1664. Von G.L. Spalding. Berlin, Freitag, 24.2.1804 .....                              | 236 |
| *1665. Von J.C. Wedeke und Frau. Vor dem 25.2.1804 .....                               | 241 |
| *1666. Von J.E.Th. von Willich. Vor dem 25.2.1804 .....                                | 242 |
| *1667. An E. Grunow. Stolp, vor dem 25.2.1804 .....                                    | 242 |

|                                                                                                 |     |
|-------------------------------------------------------------------------------------------------|-----|
| 1668. An J.E.Th. von Willich. Stolp, Sonnabend, 25.2.1804 . . . .                               | 242 |
| 1669. An Henriette von Mühlenfels.<br>Stolp, wohl Sonnabend, 25.2.1804 . . . . .                | 244 |
| 1670. An Ch. von Kathen. Stolp, Sonnabend, 25.2.1804 . . . . .                                  | 246 |
| *1671. An L. Eichmann. Stolp, vor dem 26.2.1804 . . . . .                                       | 248 |
| 1672. Von L. Eichmann.<br>Berlin, Sonntag, 26.2. bis Mittwoch, 14.3.1804 . . . . .              | 248 |
| 1673. An H.E.G. Paulus. Stolp, Mittwoch, 29.2.1804 . . . . .                                    | 251 |
| 1674. An H.E.G. Paulus. Stolp, Mittwoch, 29.2.1804 . . . . .                                    | 252 |
| *1675. An Friedrich Karl Graf von Thürheim.<br>Stolp, Mittwoch, 29.2.1804 oder später . . . . . | 254 |
| *1676. An Herrn von Zehntner.<br>Stolp, Mittwoch, 29.2.1804 oder später . . . . .               | 255 |
| *1677. An H.K.A. Eichstädt. Stolp, Anfang März 1804 . . . . .                                   | 255 |
| *1678. An L. Eichmann. Stolp; vor dem 4.3.1804 . . . . .                                        | 255 |
| 1679. Von G.L. Spalding. Berlin, Freitag, 9.3.1804 . . . . .                                    | 255 |
| *1680. An Christiane Caroline Schleyermacher.<br>Stolp, vor dem 10.3.1804 . . . . .             | 258 |
| *1681. Von C.C. Schleyermacher. Vor dem 10.3.1804 . . . . .                                     | 258 |
| 1682. Von G.A. Reimer. Berlin, Sonnabend, 10.3.1804 . . . . .                                   | 258 |
| *1683. An S.E.T. Stubenrauch, Stolp, Sonnabend, 10.3.1804 . . . .                               | 259 |
| 1684. Von L.F. Heindorf. Berlin, Dienstag, 13.3.1804 . . . . .                                  | 259 |
| 1685. An Friedrich Wilhelm III. Stolp, Donnerstag, 15.3.1804 . .                                | 263 |
| 1686. Von L.F. Heindorf. Berlin, Freitag, 16.3.1804 . . . . .                                   | 264 |
| 1687. An A.W. Schlegel. Stolp, Sonnabend, 17.3.1804 . . . . .                                   | 267 |
| 1688. Von G.A. Reimer. Berlin, Montag, 19.3.1804 . . . . .                                      | 269 |
| 1689. An G.A. Reimer. Stolp, Dienstag, 20.3.1804 . . . . .                                      | 272 |
| 1690. Von Friedrich Schlegel. Paris, Dienstag, 20.3.1804 . . . . .                              | 273 |
| 1691. Von Friedrich Carl Gottlieb Duisburg.<br>Danzig, Donnerstag, 22.3.1804 . . . . .          | 276 |
| 1692. An C.G. von Brinckmann. Stolp, Sonnabend, 24.3.1804 . .                                   | 279 |
| *1693. Von E. Grunow. Berlin, vor dem 28.3.1804 . . . . .                                       | 282 |
| *1694. Von J.E.Th. von Willich. Vor dem 28.3.1804 . . . . .                                     | 282 |
| 1695. An J.E.Th. von Willich. Stolp, Mittwoch, 28.3.1804 . . . .                                | 282 |
| 1696. Von G.A. Reimer. Berlin, Mittwoch, 28.3.1804 . . . . .                                    | 284 |
| 1697. Von Georg Wilhelm Bartholdy.<br>Stettin, Donnerstag, 29.3.1804 . . . . .                  | 287 |
| *1698. An Ch. Schleiermacher.<br>Stolp, wohl vor Anfang April 1804 . . . . .                    | 290 |
| 1699. Von Ch. Schleiermacher.<br>Gnadenfrei, Montag, 2.4. bis Freitag, 13.4.1804 . . . . .      | 290 |

|        |                                                                                 |     |
|--------|---------------------------------------------------------------------------------|-----|
| 1700.  | Von H.K.A. Eichstädt. Jena, Dienstag, 3.4.1804                                  | 293 |
| *1701. | Von F.K. Graf von Thürheim. Mittwoch, 4.4.1804                                  | 294 |
| 1702.  | Von Friedrich Wilhelm von Thulemeier.<br>Berlin, Freitag, 6.4.1804              | 294 |
| 1703.  | Von S.E.T. Stubenrauch. Landsberg, Freitag, 6.4.1804                            | 295 |
| 1704.  | Von G.A. Reimer. Berlin, Sonnabend, 7.4.1804                                    | 298 |
| *1705. | Von F.K. Graf von Thürheim. Vor dem 9.4.1804                                    | 298 |
| 1706.  | An Alexander Graf zu Dohna. Stolp, Montag, 9.4.1804                             | 298 |
| *1707. | An Ch. Schleiermacher. Stolp, wohl um den 10.4.1804                             | 300 |
| 1708.  | An F.W. von Thulemeier. Stolp, Mittwoch, 11.4.1804                              | 300 |
| *1709. | An G.L. Spalding. Stolp, Mittwoch, 11.4.1804                                    | 301 |
| 1710.  | Von G.L. Spalding. Berlin, Freitag, 13.4.1804                                   | 301 |
| *1711. | An Taubenheim. Stolp, wohl um Mitte April 1804                                  | 302 |
| 1712.  | Von Ch. Schleiermacher.<br>Gnadenfrei, Montag, 16.4. bis ca. Sonntag, 22.4.1804 | 303 |
| *1713. | An F.S.G. Sack. Stolp, vor dem 18.4.1804                                        | 308 |
| *1714. | An S.E.T. Stubenrauch. Stolp, vor dem 18.4.1804                                 | 308 |
| 1715.  | Von F.S.G. Sack. Berlin, Mittwoch, 18.4.1804                                    | 308 |
| 1716.  | Von S.E.T. Stubenrauch.<br>Landsberg, Mittwoch, 18.4. bis Freitag, 20.4.1804    | 309 |
| 1717.  | Von G.L. Spalding. Berlin, Donnerstag, 19.4.1804                                | 311 |
| 1718.  | An F.W. von Thulemeier. Stolp, Sonnabend, 21.4.1804                             | 312 |
| 1719.  | Von G.A. Reimer. Berlin, Sonntag, 22.4.1804                                     | 313 |
| 1720.  | Von F.W. von Thulemeier. Berlin, Dienstag, 24.4.1804                            | 315 |
| *1721. | Von Taubenheim. Vor dem 25.4.1804                                               | 316 |
| *1722. | Von J.E.Th. von Willich. Vor dem 25.4.1804                                      | 316 |
| 1723.  | Von F.W. von Thulemeier. Berlin, Mittwoch, 25.4.1804                            | 316 |
| 1724.  | An Friedrich Karl von Beyme. Stolp, Mittwoch, 25.4.1804                         | 318 |
| 1725.  | An J.E.Th. von Willich.<br>Stolp, Mittwoch, 25.4. bis Donnerstag, 26.4.1804     | 319 |
| *1726. | Von E. Grunow. Berlin, vor dem 26.4.1804                                        | 321 |
| 1727.  | An Ch. von Kathen. Stolp, Donnerstag, 26.4.1804                                 | 321 |
| 1728.  | An H.E.G. Paulus. Stolp, Donnerstag, 26.4.1804                                  | 323 |
| 1729.  | Von A.W. Schlegel. Berlin, April 1804                                           | 324 |
| 1730.  | Von der Realschulbuchhandlung.<br>Berlin, Mittwoch, 2.5.1804                    | 327 |
| *1731. | Von Karl Wilhelm Brunn.<br>Zwischen Mitte März und Anfang Mai 1804              | 328 |
| 1732.  | An H. Herz. Wohl Schlobitten, Anfang Mai 1804                                   | 328 |
| 1733.  | Von Friedrich Wilhelm III. Berlin, Mittwoch, 9.5.1804                           | 329 |



|                                                                                         |     |
|-----------------------------------------------------------------------------------------|-----|
| *1734. Von K.W. Brunn. Vor dem 10.5.1804 .....                                          | 329 |
| *1735. Von Julius Eberhard Wilhelm Ernst von Massow.<br>Wohl vor dem 10.5.1804 .....    | 329 |
| *1736. An S.E.T. Stubenrauch. Stolp, Donnerstag, 10.5.1804 ...                          | 330 |
| 1737. An H. Herz. Stolp, wohl um den 10.5.1804 .....                                    | 330 |
| 1738. An K.W. Brunn. Stolp, Sonnabend, 12.5.1804 .....                                  | 331 |
| *1739. An F.K. Graf von Thürheim. Stolp, Sonnabend, 12.5.1804                           | 332 |
| 1740. An G.A. Reimer. Stolp, Sonnabend, 12.5.1804 .....                                 | 332 |
| 1741. Von C.G. von Brinckmann. Berlin, Sonnabend, 12.5.1804                             | 335 |
| 1742. An F.W. von Thulemeier. Stolp, Sonntag, 13.5.1804 ....                            | 338 |
| 1743. An H.E.G. Paulus. Stolp, Mittwoch, 16.5.1804 .....                                | 339 |
| 1744. Von G.A. Reimer. Berlin, Donnerstag, 17.5.1804 .....                              | 341 |
| *1745. An G.L. Spalding. Stolp, vor dem 18.5.1804 .....                                 | 344 |
| 1746. Von G.L. Spalding. Berlin, Freitag, 18.5.1804 .....                               | 344 |
| 1747. An A.W. Schlegel. Stolp, Sonnabend, 19.5.1804 .....                               | 347 |
| 1748. An K.W. Brunn. Stolp, Mittwoch, 23.5.1804 .....                                   | 350 |
| 1749. An G.A. Reimer. Stolp, Mittwoch, 23.5.1804 .....                                  | 351 |
| 1750. An J.E.Th. von Willich. Stolp, Donnerstag, 24.5.1804 ...                          | 351 |
| *1751. An G.L. Spalding. Stolp, Sonnabend, 26.5.1804 .....                              | 353 |
| 1752. An F. Schlegel. Stolp, Sonnabend, 26.5.1804 .....                                 | 353 |
| 1753. Von Friedrich Wilhelm III. Berlin, Sonntag, 27.5.1804 ....                        | 356 |
| *1754. Von Taubenheim. Sonntag, 27.5.1804 oder früher .....                             | 357 |
| 1755. Von G.A. Reimer. Berlin, Sonntag, 27.5.1804 .....                                 | 357 |
| 1756. Von J.E.W.E. von Massow. Berlin, Montag, 28.5.1804 ..                             | 360 |
| *1757. An Carl Schleiermacher. Stolp, wohl zweite Maihälfte 1804                        | 360 |
| *1758. An F.S.G. Sack. Stolp, wohl Ende Mai/Anfang Juni 1804                            | 360 |
| 1759. Von F.W. von Thulemeier. Berlin, Freitag, 1.6.1804 .....                          | 360 |
| 1760. Von Ch. Schleiermacher.<br>Gnadenfrei, vor dem 2. Juni bis Mitte Juni 1804 .....  | 361 |
| *1761. An G.L. Spalding. Stolp, Sonnabend, 2.6.1804 .....                               | 366 |
| 1762. An K.W. Brunn. Stolp, Sonnabend, 2.6.1804 .....                                   | 366 |
| 1763. Von S.E.T. Stubenrauch.<br>Landsberg, Sonntag, 3.6. bis Montag, 4.6.1804 .....    | 368 |
| *1764. An Ch. Schleiermacher. Stolp, wohl Anfang Juni 1804 ...                          | 370 |
| 1765. An H. Herz. Stolp, Anfang Juni 1804 .....                                         | 370 |
| 1766. An J.E.Th. von Willich. Greifswald, Montag, 11.6.1804 .                           | 371 |
| 1767. An J.E.Th. von Willich, mit Zusätzen von G.A. Reimer.<br>Nach dem 11.6.1804 ..... | 372 |
| 1768. An J.E.Th. von Willich, mit einem Zusatz von H. Herz.<br>Nach dem 11.6.1804 ..... | 373 |

|        |                                                                                      |     |
|--------|--------------------------------------------------------------------------------------|-----|
| *1769  | An S.E.T. Stubenrauch. Vor dem 17.6.1804 .....                                       | 373 |
| 1770.  | Von F.S.G. Sack. Berlin, Juni 1804 .....                                             | 374 |
| 1771.  | Von Theodor Anton Heinrich Schmalz.<br>Halle, Dienstag, 3.7.1804 .....               | 376 |
| 1772.  | Von Luise von Willich.<br>Sagard, Donnerstag, 5.7. bis Dienstag, 10.7.1804 .....     | 378 |
| 1773.  | Von H. von Mühlensfels. Poseritz, Sonntag, 8.7.1804 .....                            | 383 |
| *1774. | Von J.E.Th. von Willich. Wohl 8.7.1804 .....                                         | 385 |
| *1775. | Von Ch. von Kathen. Wohl um den 8.7.1804 .....                                       | 385 |
| *1776. | Von Charlotte Pistorius. Wohl um den 8.7.1804 .....                                  | 385 |
| *1777. | Von E. Grunow. Vor dem 12.7.1804 .....                                               | 385 |
| *1778. | Von E. Grunow. Vor dem 12.7.1804 .....                                               | 385 |
| 1779.  | An Th.A.H. Schmalz. Stolp, nach dem 12.7.1804 .....                                  | 385 |
| 1780.  | Von S.E.T. Stubenrauch. Landsberg, Freitag, 13.7.1804 ..                             | 386 |
| 1781.  | An G.A. Reimer. Stolp, Sonnabend, 14.7.1804 .....                                    | 388 |
| 1782.  | An L. von Willich. Stolp, Sonnabend, 14.7.1804 .....                                 | 389 |
| 1783.  | Von L. von Willich.<br>Sagard, Montag, 16.7. bis Sonntag, 22.7.1804 .....            | 391 |
| 1784.  | Von C.G. von Brinckmann.<br>Berlin, Dienstag, 24.7.1804 .....                        | 394 |
| 1785.  | An J.E.Th. von Willich.<br>Stolp, wohl Donnerstag, 26.7.1804 oder später .....       | 396 |
| 1786.  | An H. von Mühlensfels.<br>Stolp, wohl Donnerstag, 26.7.1804 oder später .....        | 399 |
| 1787.  | Von Ch. Schleiermacher.<br>Gnadenfrei, vor dem 27.7. bis Freitag, 27.7.1804 .....    | 401 |
| *1788. | An G.L. Spalding. Stolp, vor dem 27.7.1804 .....                                     | 404 |
| 1789.  | Von G.L. Spalding. Friedrichsfelde, Freitag, 27.7.1804 ...                           | 404 |
| 1790.  | An Ch. Pistorius. Stolp, Sonnabend, 28.7.1804 .....                                  | 409 |
| 1791.  | Von G.L. Spalding.<br>Friedrichsfelde, Sonnabend, 28.7.1804 .....                    | 411 |
| 1792.  | An L. von Willich.<br>Stolp, Sonntag, 29.7. bis Montag, 30.7.1804 .....              | 411 |
| *1793. | An S.E.T. Stubenrauch. Stolp, vor dem 31.7.1804 .....                                | 413 |
| 1794.  | Von S.E.T. Stubenrauch.<br>Landsberg, Dienstag, 31.7.1804 bis Freitag, 3.8.1804 .... | 413 |
| 1795.  | An F.S.G. Sack. Stolp, Juni/Juli 1804 oder später .....                              | 417 |
| 1796.  | An C.G. von Brinckmann. Stolp, Mittwoch, 1.8.1804 ....                               | 418 |
| *1797. | An August Hermann Niemeyer. Stolp, Mittwoch, 1.8.1804                                | 420 |
| 1798.  | An Friedrich Wilhelm III. Stolp, Mittwoch, 1.8.1804 ....                             | 421 |

|                                                                                                                      |     |
|----------------------------------------------------------------------------------------------------------------------|-----|
| 1799. An G.A. Reimer. Stolp, um den 1.8.1804 .....                                                                   | 422 |
| *1800. An das reformierte Kirchendirektorium.<br>Stolp, wohl Sonnabend, 4.8.1804 .....                               | 424 |
| 1801. An K.W. Brunn. Stolp, Sonnabend, 4.8.1804 .....                                                                | 424 |
| 1802. An Ch. von Kathen. Stolp, Sonnabend, 4.8.1804 .....                                                            | 425 |
| 1803. An L. von Willich. Stolp, Sonnabend, 4.8.1804 .....                                                            | 426 |
| 1804. Von G.A. Reimer. Berlin, Montag, 6.8.1804 .....                                                                | 427 |
| *1805. An Ch. Schleiermacher. Stolp, vor dem 7.8.1804 .....                                                          | 430 |
| 1806. Von Ch. Schleiermacher.<br>Gnadenfrei, vor dem 8.8. bis Freitag, 17.8.1804 .....                               | 430 |
| 1807. Von L. Eichmann. Charlottenburg, Donnerstag, 9.8.1804 ..                                                       | 433 |
| 1808. An G.A. Reimer. Stolp, Sonnabend, 11.8.1804 .....                                                              | 434 |
| 1809. Von C.G. von Brinckmann. Berlin, Dienstag, 14.8.1804 ..                                                        | 435 |
| *1810. An Ch. Schleiermacher. Stolp, um Mitte August 1804 ....                                                       | 437 |
| 1811. An L. von Willich. Stolp, Montag, 20.8.1804 .....                                                              | 437 |
| 1812. Von G.A. Reimer. Berlin, Donnerstag, 23.8.1804 .....                                                           | 438 |
| 1813. Von Ch. Pistorius und Unbekannt.<br>Garz, Dienstag, 28.8.1804 .....                                            | 439 |
| 1814. An L. v. Willich. Stolp, Donnerstag, 30.8.1804 .....                                                           | 440 |
| 1815. An G.A. Reimer. Stolp, Donnerstag, 30.8.1804 .....                                                             | 440 |
| 1816. Von Ch. Schleiermacher.<br>Gnadenfrei, vor dem 31.8. bis Freitag, 31.8.1804 .....                              | 441 |
| *1817. An Th.A.H. Schmalz. Stolp, vor dem 1.9.1804 .....                                                             | 446 |
| 1818. Von Th.A.H. Schmalz. Halle, Sonnabend, 1.9.1804 .....                                                          | 446 |
| 1819. Von H. von Mühlenfels.<br>Götemitz, Montag, 3.9. bis Freitag, 7.9.1804 .....                                   | 448 |
| 1820. An J.E.Th. von Willich und H. von Mühlenfels.<br>Stolp, vor dem 5.9.1804 .....                                 | 450 |
| 1821. An G.A. Reimer. Stettin, Donnerstag, 6.9.1804 .....                                                            | 451 |
| 1822. Von Carl Wilhelm von Bünting.<br>Stolp, Donnerstag, 6.9.1804 .....                                             | 453 |
| *1823. An Christlieb Benjamin Hering.<br>Soldin, Freitag, 7.9.1804 .....                                             | 454 |
| 1824. Von C.B. Hering. Stolp, Sonnabend, 15.9.1804 .....                                                             | 455 |
| *1825. An S.E.T. Stubenrauch. Vor dem 27.9.1804 .....                                                                | 457 |
| 1826. Von S.E.T. Stubenrauch.<br>Landsberg, vor dem 28.9. bis Freitag, 28.9.1804 .....                               | 457 |
| 1827. Von Ch. Schleiermacher. Gnadenfrei, Ende September/<br>Anfang Oktober bis Mittwoch, 21.11.1804 oder später ... | 459 |
| 1828. Von H. und J.E.Th. von Willich.<br>Klein Jasmund, Montag, 1.10. bis Sonntag, 7.10.1804 ...                     | 463 |

|                                                                 |     |
|-----------------------------------------------------------------|-----|
| 1829. <i>An F. Schlegel. Berlin, Mittwoch, 10.10.1804</i> ..... | 467 |
| 1830. <i>An C.G. von Brinckmann. Berlin, Oktober 1804</i> ..... | 469 |
